# Supplementary material
Source: Springer Nature journal article supplement (https://www.springermedizin.de/resource/supplementary/13013_2006_7_MOESM1_ESM.pdf/9630754)
Supplement: MOESM1 [file 9630754]

# BRACE QUESTIONNAIRE

*This questionnaire asks how you feel about your health, while you are wearing a brace. This is not a test and there are no right or wrong answers*

- *Please read carefully every question*
- *Choose the best answer and mark with an x*

| <b>Example</b>                                                   | <b>Never</b>             | <b>Almost never</b>      | <b>Sometimes</b>         | <b>Most of the time</b> | <b>Always</b>            |
|------------------------------------------------------------------|--------------------------|--------------------------|--------------------------|-------------------------|--------------------------|
| <b>During the last week you were in a good mood for studying</b> | <input type="checkbox"/> | <input type="checkbox"/> | <input type="checkbox"/> | <b>x</b>                | <input type="checkbox"/> |

**Please tell us a few things about yourself:**

**You are:**  a girl  a boy      **Age:** ..... years old

**You are wearing the brace since .....**

**You are wearing the brace for ..... hours /day**

**Date.....**

| <i>During the past 3 months...</i>                      | <b>Never</b>             | <b>Almost never</b>      | <b>Sometimes</b>         | <b>Most of the time</b>  | <b>Always</b>            |
|---------------------------------------------------------|--------------------------|--------------------------|--------------------------|--------------------------|--------------------------|
| <b>1. The brace made you feel ill</b>                   | <input type="checkbox"/> | <input type="checkbox"/> | <input type="checkbox"/> | <input type="checkbox"/> | <input type="checkbox"/> |
| <b>2. You were afraid that your back will get worse</b> | <input type="checkbox"/> | <input type="checkbox"/> | <input type="checkbox"/> | <input type="checkbox"/> | <input type="checkbox"/> |

| <i>During the past 3 months while you were wearing the brace...</i> | <b>Never</b>             | <b>Almost never</b>      | <b>Sometimes</b>         | <b>Most of the time</b>  | <b>Always</b>            |
|---------------------------------------------------------------------|--------------------------|--------------------------|--------------------------|--------------------------|--------------------------|
| <b>3. You felt tired when walking</b>                               | <input type="checkbox"/> | <input type="checkbox"/> | <input type="checkbox"/> | <input type="checkbox"/> | <input type="checkbox"/> |
| <b>4. You were able to run</b>                                      | <input type="checkbox"/> | <input type="checkbox"/> | <input type="checkbox"/> | <input type="checkbox"/> | <input type="checkbox"/> |
| <b>5. You managed to wear the brace without any help</b>            | <input type="checkbox"/> | <input type="checkbox"/> | <input type="checkbox"/> | <input type="checkbox"/> | <input type="checkbox"/> |
| <b>6. You managed to take out the brace without any help</b>        | <input type="checkbox"/> | <input type="checkbox"/> | <input type="checkbox"/> | <input type="checkbox"/> | <input type="checkbox"/> |
| <b>7. You couldn't eat well</b>                                     | <input type="checkbox"/> | <input type="checkbox"/> | <input type="checkbox"/> | <input type="checkbox"/> | <input type="checkbox"/> |
| <b>8. You couldn't sleep well</b>                                   | <input type="checkbox"/> | <input type="checkbox"/> | <input type="checkbox"/> | <input type="checkbox"/> | <input type="checkbox"/> |
| <b>9. You couldn't breath well</b>                                  | <input type="checkbox"/> | <input type="checkbox"/> | <input type="checkbox"/> | <input type="checkbox"/> | <input type="checkbox"/> |

| <i>During the past 3 months...</i>                                       | Never                    | Almost never             | Sometimes                | Most of the time         | Always                   |
|--------------------------------------------------------------------------|--------------------------|--------------------------|--------------------------|--------------------------|--------------------------|
| 10. The brace made you feel nervous                                      | <input type="checkbox"/> | <input type="checkbox"/> | <input type="checkbox"/> | <input type="checkbox"/> | <input type="checkbox"/> |
| 11. You felt worried because of the brace                                | <input type="checkbox"/> | <input type="checkbox"/> | <input type="checkbox"/> | <input type="checkbox"/> | <input type="checkbox"/> |
| 12. You felt happy                                                       | <input type="checkbox"/> | <input type="checkbox"/> | <input type="checkbox"/> | <input type="checkbox"/> | <input type="checkbox"/> |
| 13. You believed that your life would be better if you were not on brace | <input type="checkbox"/> | <input type="checkbox"/> | <input type="checkbox"/> | <input type="checkbox"/> | <input type="checkbox"/> |
| 14. You believed that brace treatment was beneficial                     | <input type="checkbox"/> | <input type="checkbox"/> | <input type="checkbox"/> | <input type="checkbox"/> | <input type="checkbox"/> |

| <i>During the past 1 month...</i>     | Never                    | Almost never             | Sometimes                | Most of the time         | Always                   |
|---------------------------------------|--------------------------|--------------------------|--------------------------|--------------------------|--------------------------|
| 15. You felt proud of yourself        | <input type="checkbox"/> | <input type="checkbox"/> | <input type="checkbox"/> | <input type="checkbox"/> | <input type="checkbox"/> |
| 16. You were satisfied with your body | <input type="checkbox"/> | <input type="checkbox"/> | <input type="checkbox"/> | <input type="checkbox"/> | <input type="checkbox"/> |

| <i>During the past 1 month...</i>                     | Never                    | Almost never             | Sometimes                | Most of the time         | Always                   |
|-------------------------------------------------------|--------------------------|--------------------------|--------------------------|--------------------------|--------------------------|
| 17. You felt strong and full of energy                | <input type="checkbox"/> | <input type="checkbox"/> | <input type="checkbox"/> | <input type="checkbox"/> | <input type="checkbox"/> |
| 18. You felt tired and exhausted because of the brace | <input type="checkbox"/> | <input type="checkbox"/> | <input type="checkbox"/> | <input type="checkbox"/> | <input type="checkbox"/> |

| <i>During the past 1 month, because of the brace...</i>        | Never                    | Almost never             | Sometimes                | Most of the time         | Always                   |
|----------------------------------------------------------------|--------------------------|--------------------------|--------------------------|--------------------------|--------------------------|
| <b>19. You had difficulties with your lessons</b>              | <input type="checkbox"/> | <input type="checkbox"/> | <input type="checkbox"/> | <input type="checkbox"/> | <input type="checkbox"/> |
| <b>20. You were absent from school</b>                         | <input type="checkbox"/> | <input type="checkbox"/> | <input type="checkbox"/> | <input type="checkbox"/> | <input type="checkbox"/> |
| <b>21. You found it hard to pay attention in the classroom</b> | <input type="checkbox"/> | <input type="checkbox"/> | <input type="checkbox"/> | <input type="checkbox"/> | <input type="checkbox"/> |

| <i>During the past 1 month, while you were wearing the brace...</i> | Never                    | Almost never             | Sometimes                | Most of the time         | Always                   |
|---------------------------------------------------------------------|--------------------------|--------------------------|--------------------------|--------------------------|--------------------------|
| <b>22. You had to take medication for pain</b>                      | <input type="checkbox"/> | <input type="checkbox"/> | <input type="checkbox"/> | <input type="checkbox"/> | <input type="checkbox"/> |
| <b>23. You had pain during the night</b>                            | <input type="checkbox"/> | <input type="checkbox"/> | <input type="checkbox"/> | <input type="checkbox"/> | <input type="checkbox"/> |
| <b>24. You had pain when walking</b>                                | <input type="checkbox"/> | <input type="checkbox"/> | <input type="checkbox"/> | <input type="checkbox"/> | <input type="checkbox"/> |
| <b>25. You had pain when sitting</b>                                | <input type="checkbox"/> | <input type="checkbox"/> | <input type="checkbox"/> | <input type="checkbox"/> | <input type="checkbox"/> |
| <b>26. You had pain when climbing stairs</b>                        | <input type="checkbox"/> | <input type="checkbox"/> | <input type="checkbox"/> | <input type="checkbox"/> | <input type="checkbox"/> |
| <b>27. You felt pins and needles to your arms or legs</b>           | <input type="checkbox"/> | <input type="checkbox"/> | <input type="checkbox"/> | <input type="checkbox"/> | <input type="checkbox"/> |

| <i>During the past 1 month, because of the brace...</i>                                                                  | <b>Never</b>             | <b>Almost never</b>      | <b>Sometimes</b>         | <b>Most of the time</b>  | <b>Always</b>            |
|--------------------------------------------------------------------------------------------------------------------------|--------------------------|--------------------------|--------------------------|--------------------------|--------------------------|
| <b>28. You couldn't go out with your friends</b>                                                                         | <input type="checkbox"/> | <input type="checkbox"/> | <input type="checkbox"/> | <input type="checkbox"/> | <input type="checkbox"/> |
| <b>29. Your friends felt compassion for you</b>                                                                          | <input type="checkbox"/> | <input type="checkbox"/> | <input type="checkbox"/> | <input type="checkbox"/> | <input type="checkbox"/> |
| <b>30. You felt different from your peers</b>                                                                            | <input type="checkbox"/> | <input type="checkbox"/> | <input type="checkbox"/> | <input type="checkbox"/> | <input type="checkbox"/> |
| <b>31. You had problems with your family</b>                                                                             | <input type="checkbox"/> | <input type="checkbox"/> | <input type="checkbox"/> | <input type="checkbox"/> | <input type="checkbox"/> |
| <b>32. You believed that your relationship with your family or your friends would be better if you were not on brace</b> | <input type="checkbox"/> | <input type="checkbox"/> | <input type="checkbox"/> | <input type="checkbox"/> | <input type="checkbox"/> |
| <b>33. You stayed at home because you were ashamed</b>                                                                   | <input type="checkbox"/> | <input type="checkbox"/> | <input type="checkbox"/> | <input type="checkbox"/> | <input type="checkbox"/> |
| <b>34. You worn special clothes</b>                                                                                      | <input type="checkbox"/> | <input type="checkbox"/> | <input type="checkbox"/> | <input type="checkbox"/> | <input type="checkbox"/> |

*Thank you!*
